# Supplementary material for: Genomic variability in Mexican chicken population using copy number variants
Source: PubMed Central journal article supplement (PMC5496433; doi:10.1186/s12863-017-0524-4), 2017-07-03

# Cluster dendrogram with AU/BP values (%)

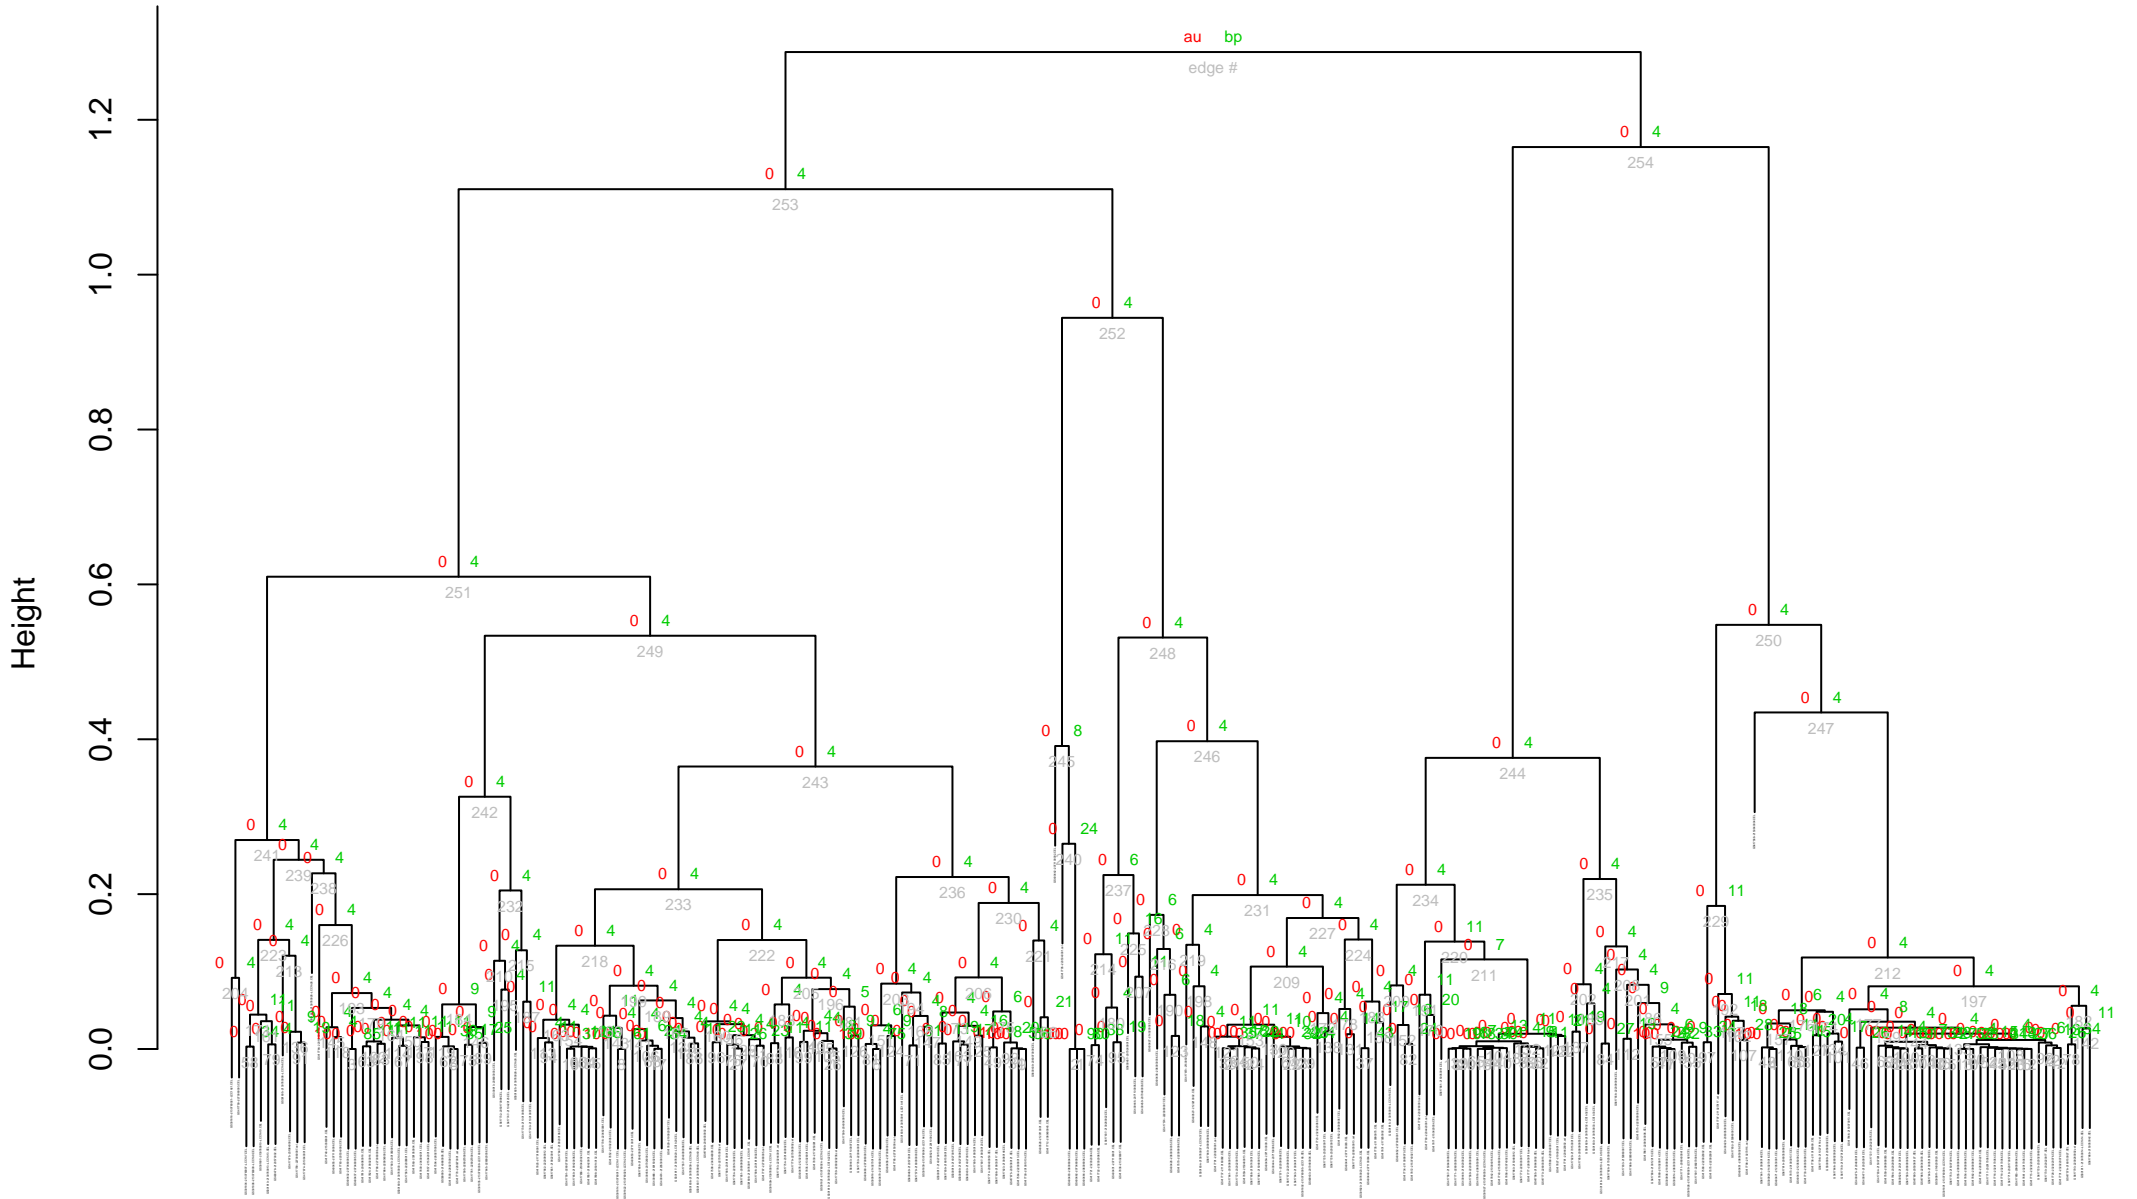

Supplement: 12863_2017_524_MOESM2_ESM.pdf [file 12863_2017_524_MOESM2_ESM.pdf]
